# Supplementary material
Source: PubMed Central journal article supplement (PMC4073598)
Supplement: NIHMS438560-supplement-1_si_001.pdf [file NIHMS438560-supplement-1_si_001.pdf]

---

# Supporting Information

## Structural factors controlling the spin-spin exchange coupling: EPR spectroscopic studies of strongly asymmetric trityl-nitroxide biradicals

Yangping Liu,<sup>†</sup> Frederick A. Villamena,<sup>†,‡</sup> Antal Rockenbauer,<sup>\*,§</sup> Yuguang Song,<sup>†</sup>  
Jay L. Zweier<sup>\*,†</sup>

<sup>†</sup>*Center for Biomedical EPR Spectroscopy and Imaging, The Davis Heart and Lung Research Institute, the Division of Cardiovascular Medicine, Department of Internal Medicine, and* <sup>‡</sup>*Department of Pharmacology, College of Medicine, The Ohio State University, Columbus, Ohio 43210, United States, and* <sup>§</sup>*Institute of Molecular Pharmacology, Research Centre for Natural Sciences, P.O. Box 17, H-1525 Budapest, Hungary*

Corresponding authors: Jay L. Zweier and Antal Rockenbauer

Email: [Jay.Zweier@osumc.edu](mailto:Jay.Zweier@osumc.edu); [rocky@chemres.hu](mailto:rocky@chemres.hu)

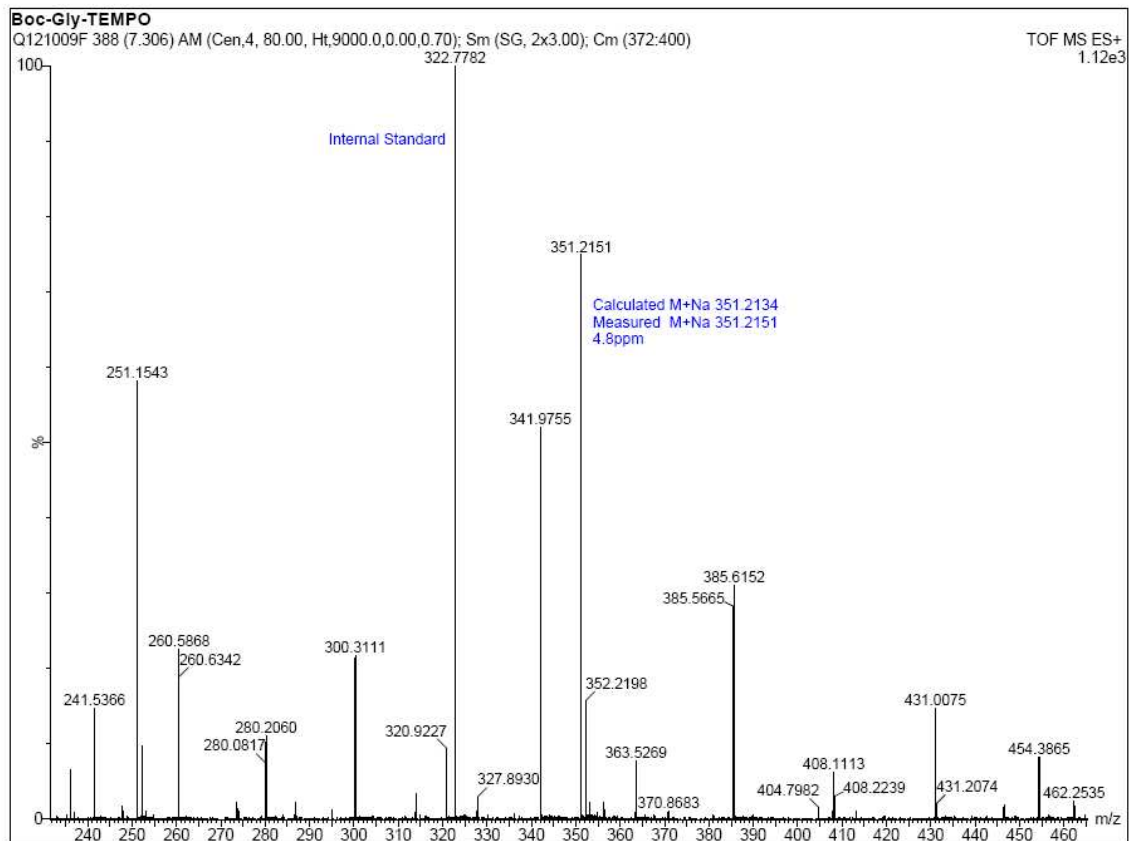

Figure S1. Mass spectrum (ESI) of GT.

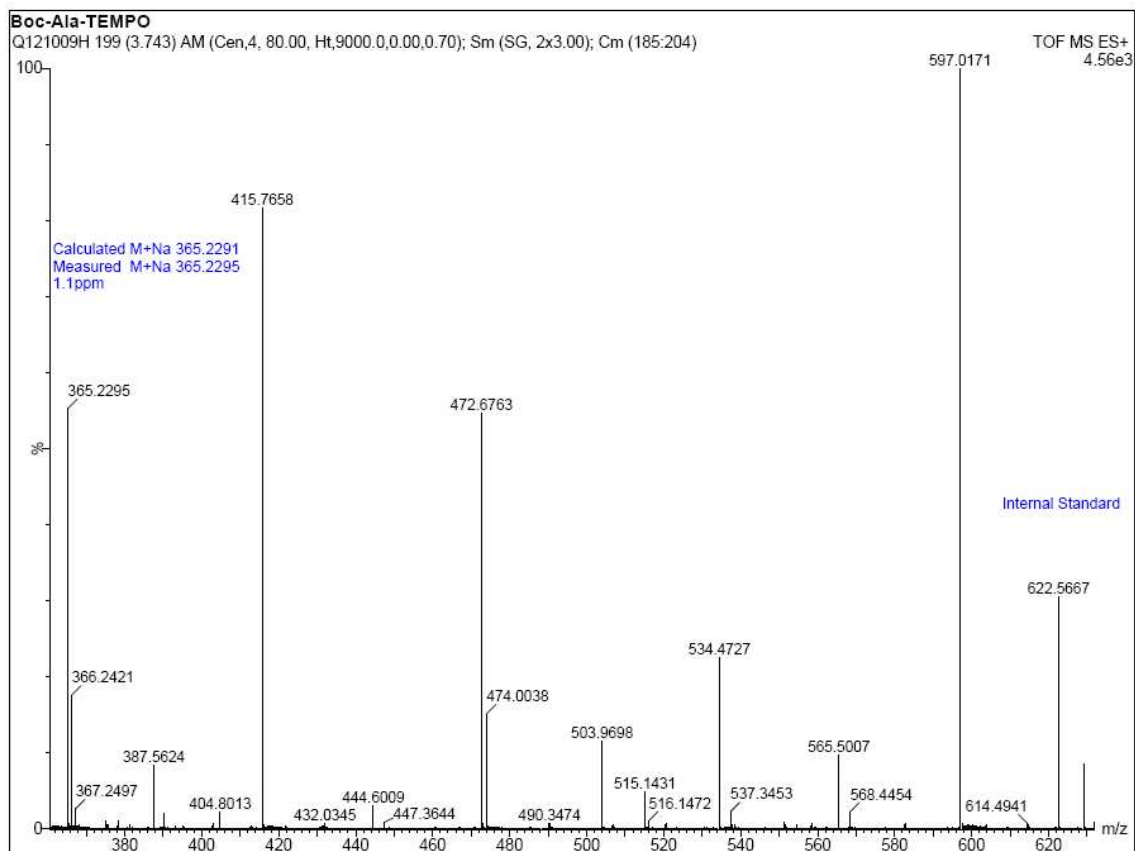

Figure S2. Mass spectrum (ESI) of AT.

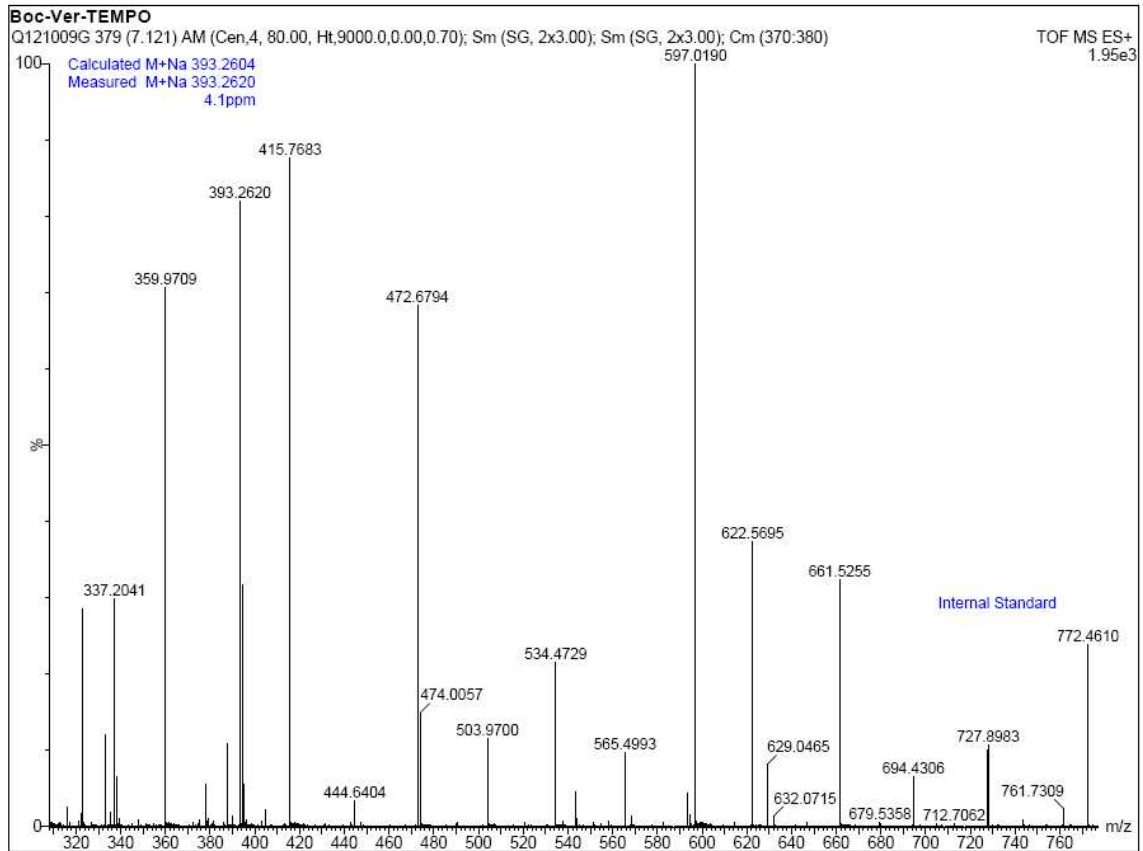

Figure S3. Mass spectrum (ESI) of VT.

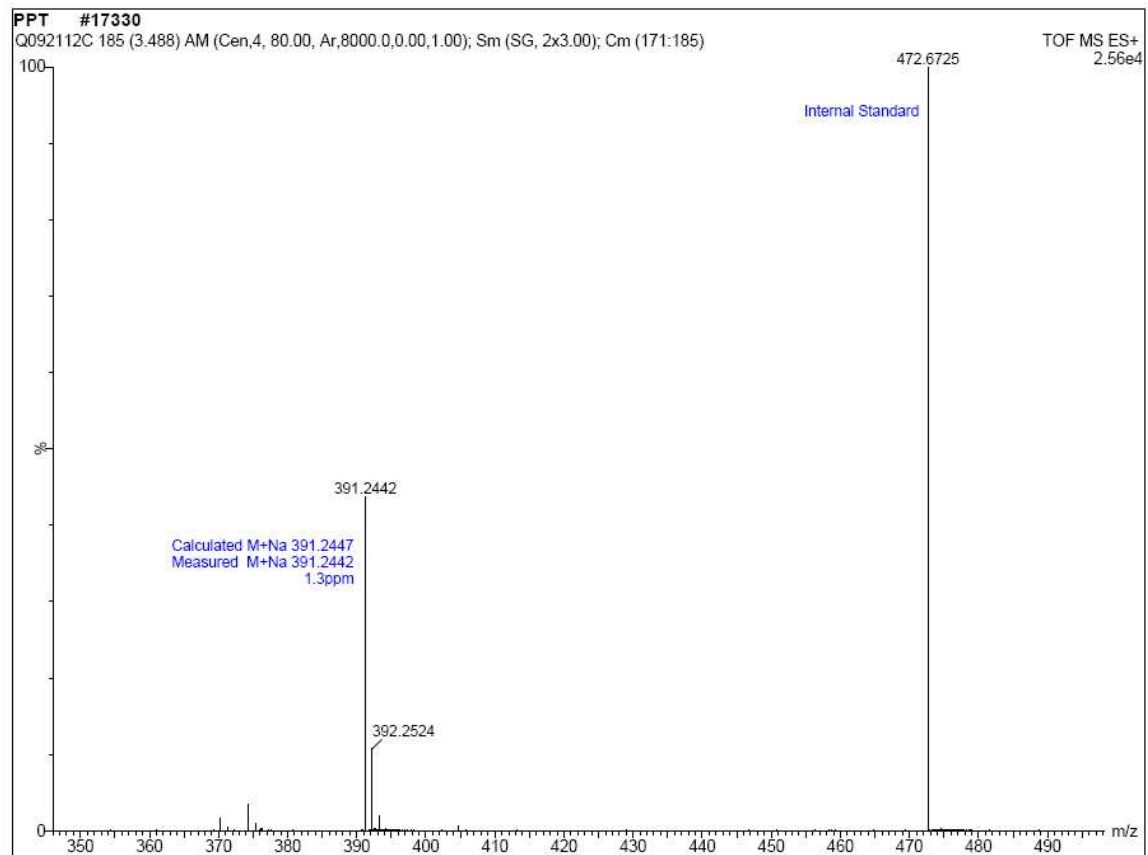

Figure S4. Mass spectrum (ESI) of PPT.

D:\DATA\MALDI\Dec 09\M121009\15149 CT02 GLY TEMPO\0\_F4\1

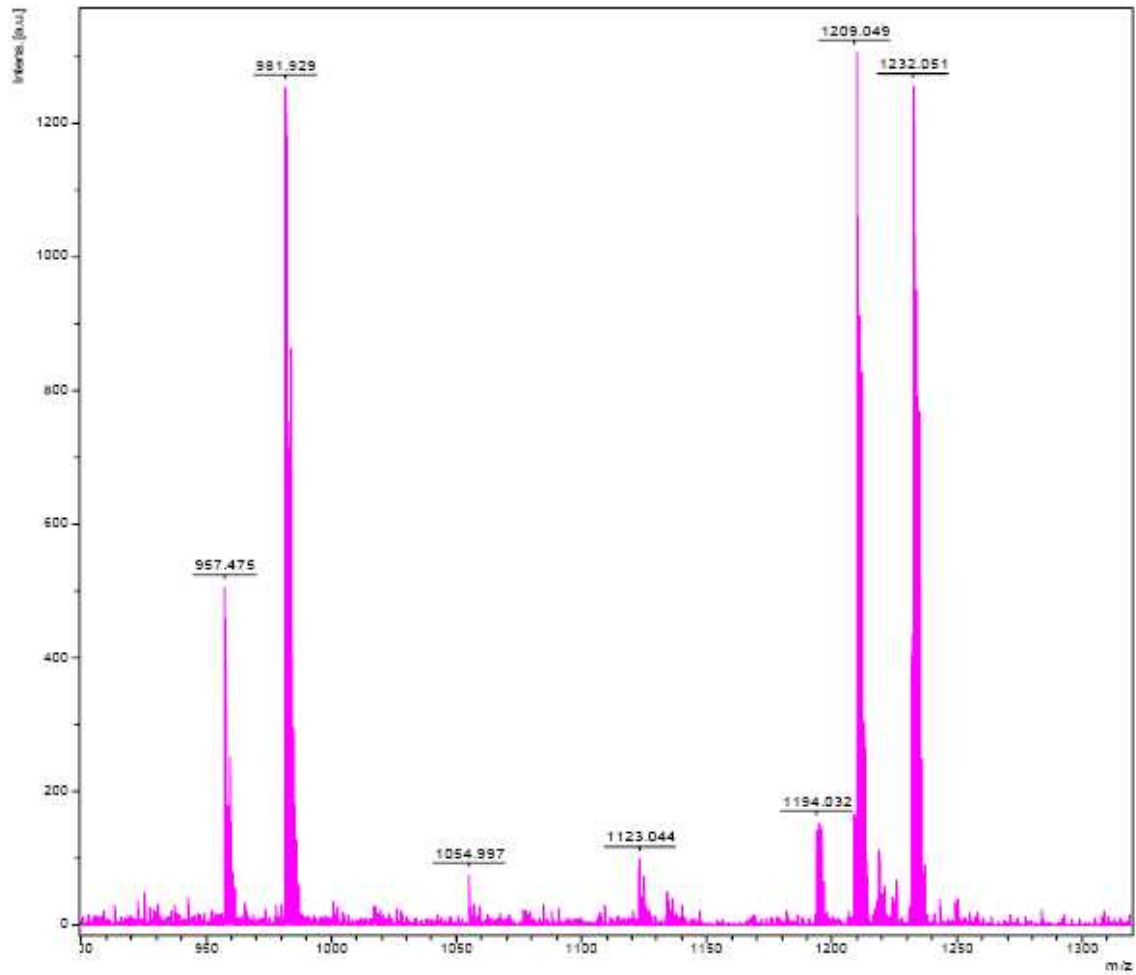

Figure S5. Mass spectrum (MALDI) of CT02-GT.

D:\DATA\MALDI\Dec 09\M121009\15149 CT02 ALA TEMPO\0\_F5\1

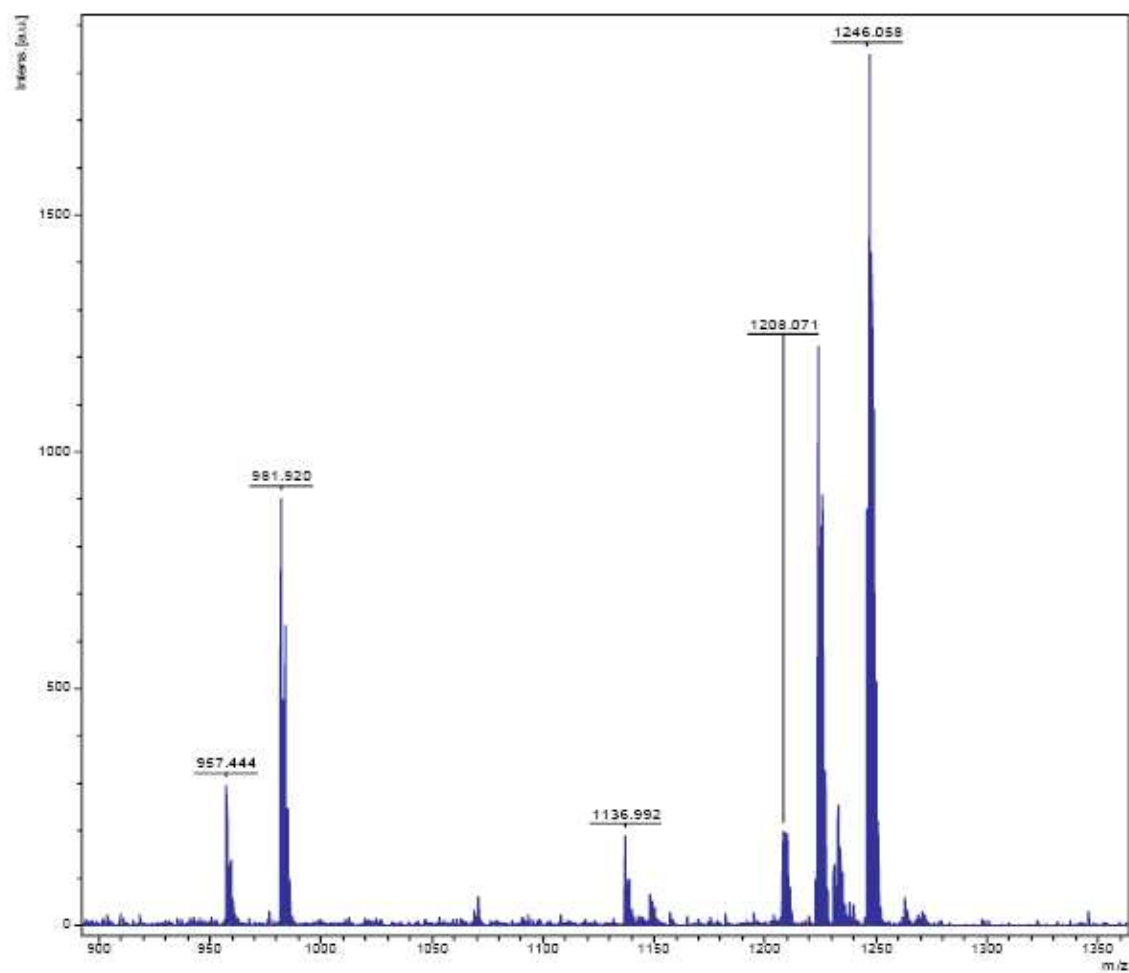

Figure S6. Mass spectrum (MALDI) of CT02-AT.

D:\DATA\MALDI\Dec 09\M121009\15149 CT02 VER TEMPO\0\_F6\1

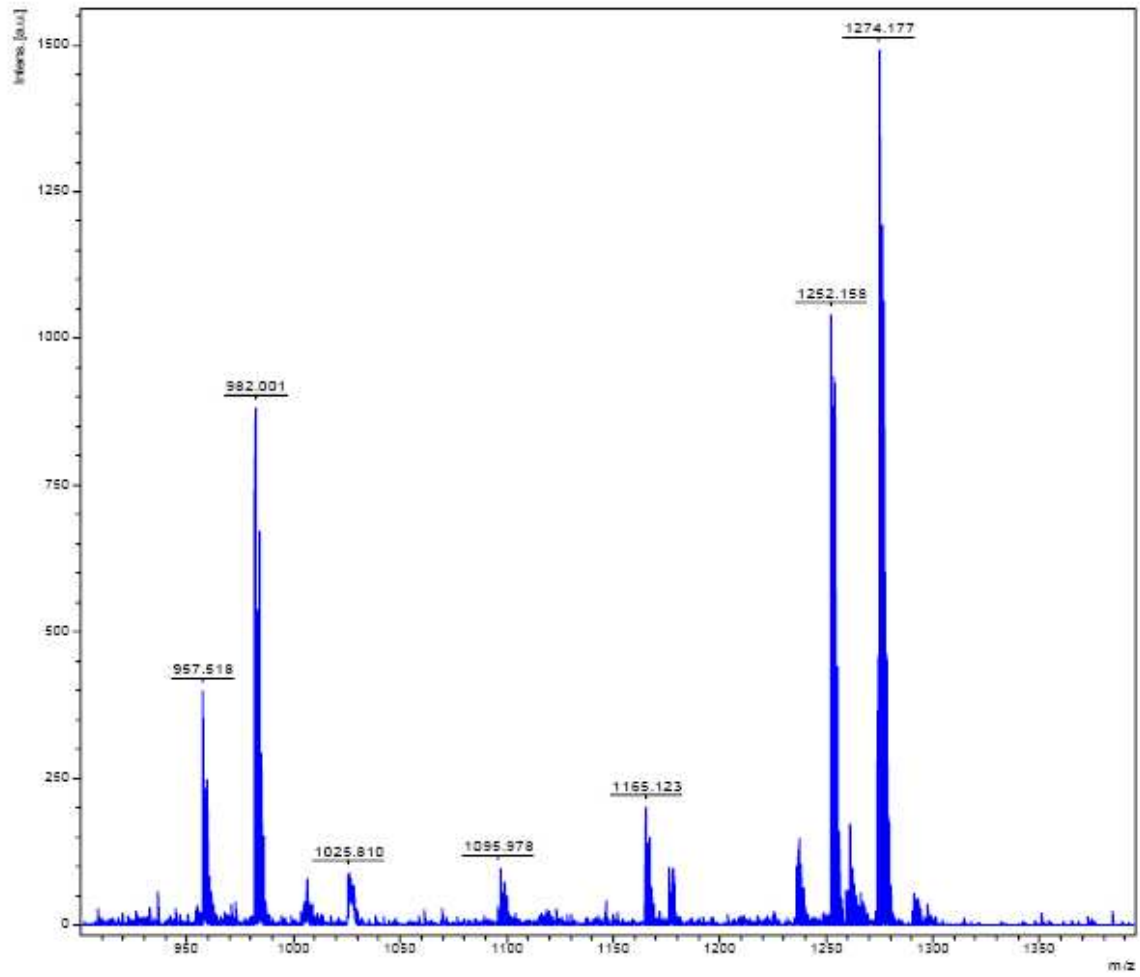

Figure S7. Mass spectrum (MALDI) of CT02-VT.



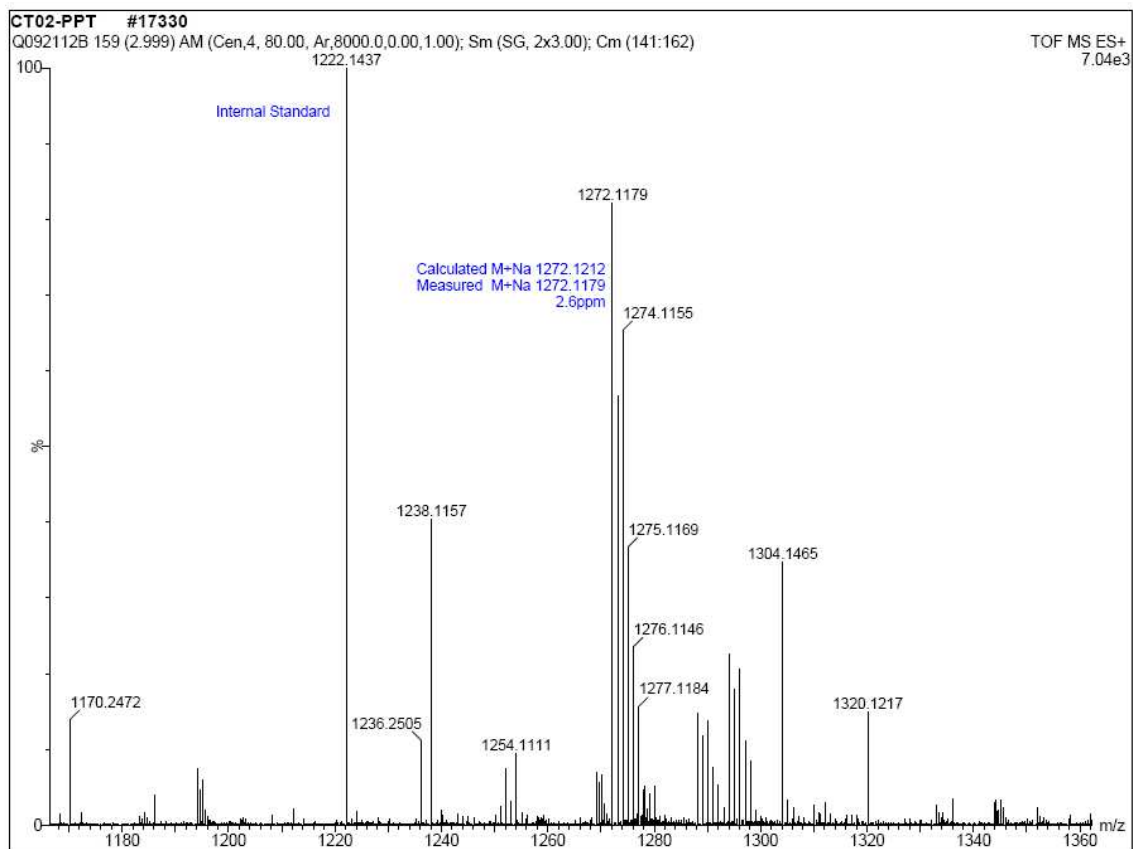

Figure S8. Mass spectrum (ESI) of CT02-PPT.

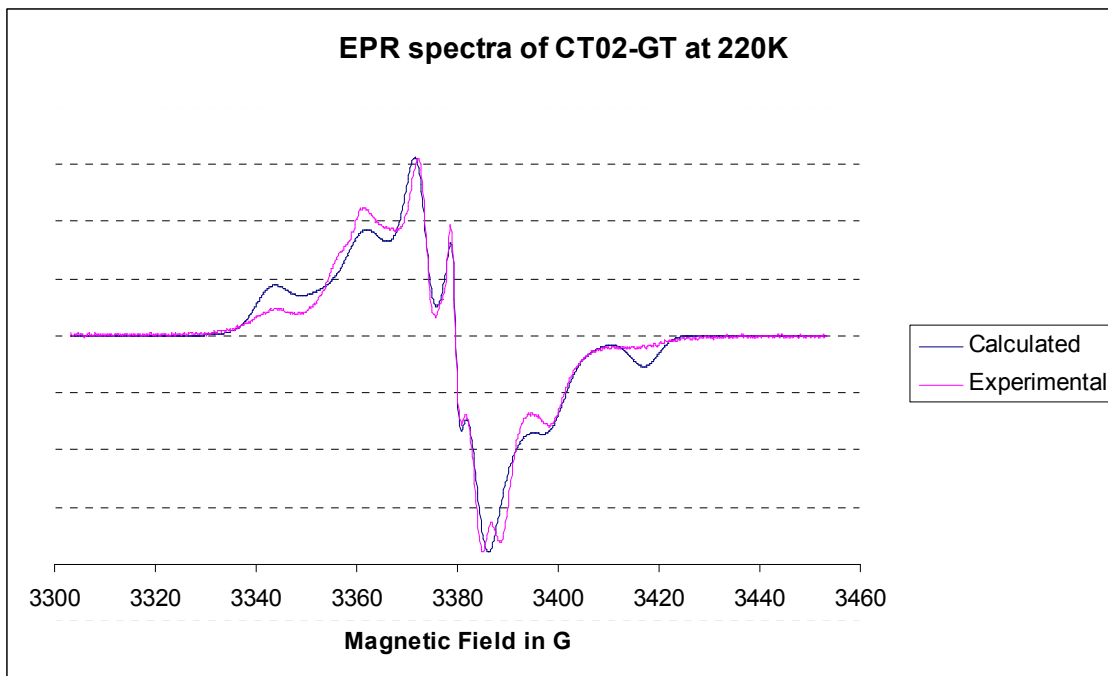

Figure S9. Experimental and simulated EPR spectra of CT02-GT at 220 K in ethylene glycol/H<sub>2</sub>O(1:1, v/v) glass-forming solution.

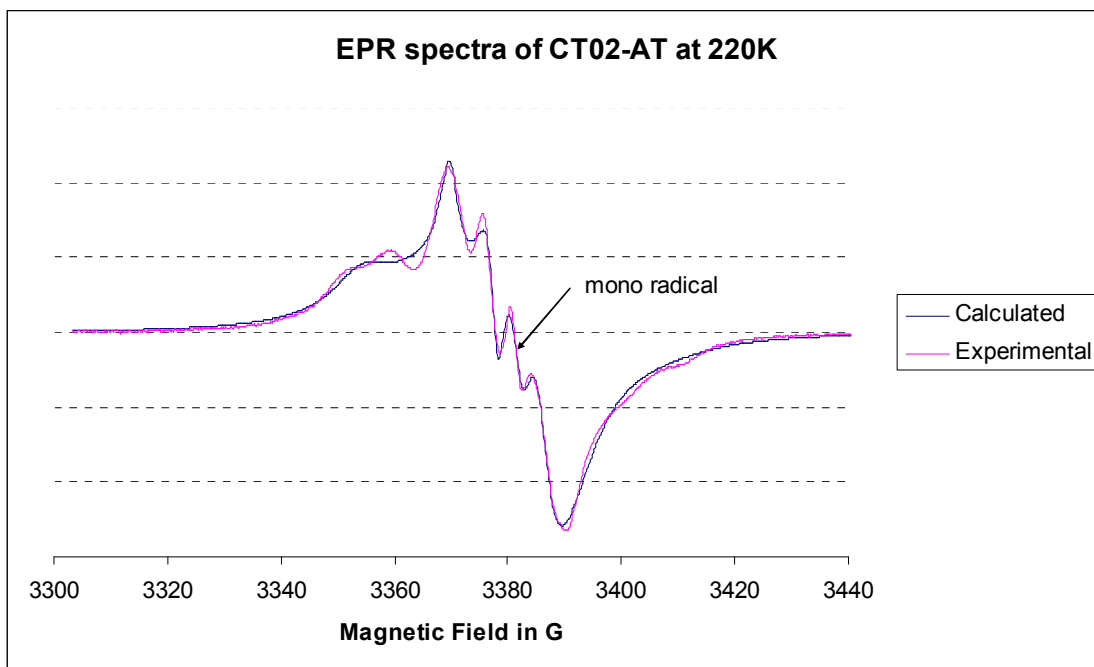

Figure S10. Experimental and simulated EPR spectra of CT02-AT at 220 K in ethylene glycol/H<sub>2</sub>O(1:1, v/v) glass-forming solution.

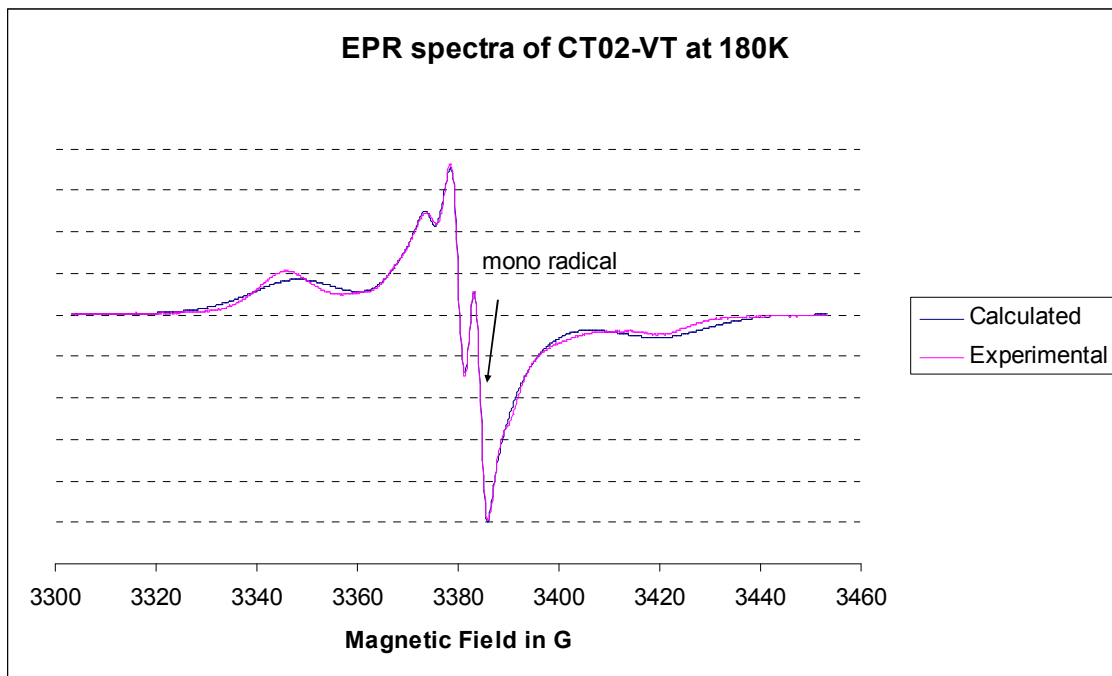

Figure S11. Experimental and simulated EPR spectra of CT02-VT at 180 K in ethylene glycol/H<sub>2</sub>O(1:1, v/v) glass-forming solution.

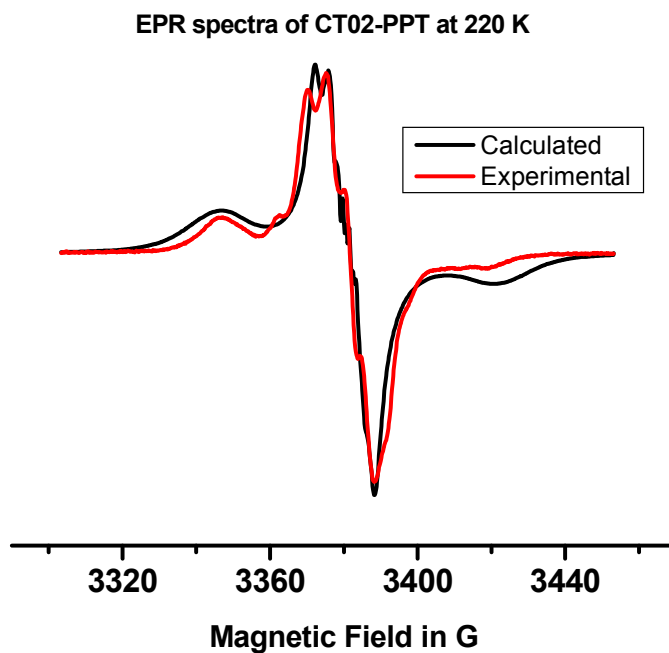

Figure S12. Experimental and simulated EPR spectra of CT02-PPT at 220 K in ethylene glycol/H<sub>2</sub>O(1:1, v/v) glass-forming solution.

---

The Cartesian coordinates for two conformers of CT02-PPT were generated using the GaussView 3.0 Program.

### Conformer 1

|   |             |             |             |
|---|-------------|-------------|-------------|
| C | -3.06912100 | -2.55218100 | 0.20510500  |
| C | -1.77623400 | -1.77944300 | 0.06687400  |
| O | -3.04223400 | -3.67612100 | 0.63244900  |
| C | -1.45146900 | -0.76449300 | 0.95237300  |
| C | -0.19908100 | -0.16697100 | 0.93064200  |
| C | 0.76833900  | -0.56707200 | 0.00902200  |
| C | 0.42633700  | -1.57159900 | -0.90063700 |
| C | -0.82389900 | -2.17082400 | -0.86033600 |
| C | 2.10792000  | 0.05731100  | 0.00014300  |
| C | 2.20678100  | 1.53288200  | 0.03782100  |
| C | 3.31242900  | -0.80181300 | -0.03498200 |
| C | 1.46729200  | 2.30430200  | -0.85401500 |
| C | 1.51112300  | 3.69331100  | -0.81544200 |
| C | 2.29277700  | 4.35134300  | 0.13457900  |
| C | 3.04611100  | 3.57973000  | 1.03081100  |
| C | 3.00033700  | 2.19160600  | 0.97754400  |
| C | 3.45091900  | -1.85741000 | 0.86041200  |
| C | 4.55354700  | -2.70291000 | 0.81294800  |
| C | 5.54974500  | -2.51721600 | -0.14664500 |
| C | 5.42051200  | -1.44844400 | -1.04414500 |
| C | 4.31764600  | -0.60630500 | -0.98134900 |
| S | 2.23462500  | -2.24400900 | 2.08076400  |
| C | 3.32862200  | -3.27611300 | 3.11498600  |
| S | 4.57098100  | -4.01728800 | 2.00207000  |
| S | 6.53714800  | -1.13012100 | -2.39285300 |
| C | 5.96597200  | 0.56259900  | -2.75002400 |
| S | 4.22496100  | 0.66046400  | -2.21049300 |
| S | 1.49837300  | -2.13689300 | -2.18751900 |
| C | 0.55729200  | -3.64506100 | -2.63270900 |
| S | -1.17543200 | -3.36219200 | -2.11984600 |
| S | -2.58537900 | -0.18912000 | 2.18508100  |
| C | -1.35258200 | 0.68718200  | 3.21680100  |
| S | 0.04342400  | 1.12390300  | 2.11522600  |
| C | 0.30436700  | 3.08786200  | -3.11387600 |
| S | 0.50011500  | 4.52776500  | -2.00839800 |
| S | 4.01201200  | 4.25065500  | 2.36616000  |
| C | 4.96551600  | 2.73917200  | 2.72189500  |
| S | 3.93337400  | 1.32554100  | 2.20342400  |
| S | 0.38746500  | 1.59942200  | -2.06085400 |
| C | 6.29078400  | 2.74788300  | 1.95630000  |

---

|   |              |             |             |
|---|--------------|-------------|-------------|
| C | 5.21782300   | 2.65013200  | 4.22662600  |
| C | 4.00675800   | -2.42804700 | 4.19263800  |
| C | 2.50295000   | -4.39267100 | 3.75272700  |
| C | 6.81923800   | 1.58712800  | -1.99850100 |
| C | 6.03948200   | 0.80761300  | -4.25686400 |
| C | 0.60873300   | -3.83324700 | -4.14777600 |
| C | 1.13261500   | -4.86746000 | -1.91394300 |
| C | -1.97643900  | 1.97286300  | 3.75628200  |
| C | -0.88290800  | -0.20923500 | 4.36376600  |
| C | 1.40919400   | 3.06349600  | -4.17104800 |
| C | -1.07041300  | 3.15299700  | -3.77711200 |
| C | 6.68415500   | -3.49444800 | -0.16744000 |
| C | 2.25347800   | 5.84864700  | 0.14596800  |
| O | 3.10280800   | 6.41840800  | 0.94726000  |
| O | 7.64821200   | -3.20542500 | -0.98925400 |
| O | 6.72436400   | -4.49363400 | 0.48605000  |
| O | 1.49293700   | 6.50589800  | -0.49913700 |
| N | -4.20351200  | -1.91277100 | -0.16642400 |
| C | -5.46780000  | -2.56772600 | 0.09232800  |
| C | -6.32591400  | -2.52142300 | -1.15918200 |
| N | -6.45355100  | -1.17159300 | -1.66721400 |
| C | -5.15447500  | -0.66827000 | -2.04494400 |
| C | -4.26462300  | -0.60394000 | -0.81586600 |
| C | -7.53289400  | -0.34846500 | -1.78784900 |
| C | -8.93360600  | -0.66479400 | -1.18715300 |
| C | -9.10910300  | -1.39705800 | 0.18350400  |
| C | -9.42969900  | -0.47358600 | 1.39443000  |
| N | -8.88238600  | 0.88563100  | 1.13830200  |
| C | -9.44697000  | 1.63195300  | -0.02417100 |
| C | -9.76908100  | 0.63392100  | -1.16437700 |
| O | -7.45092400  | 0.62196800  | -2.49533400 |
| O | -7.59222200  | 0.79502900  | 1.06587600  |
| C | -8.78306200  | -1.00022900 | 2.67879000  |
| C | -10.94253500 | -0.45938400 | 1.67126200  |
| C | -8.47065800  | 2.74282200  | -0.42895400 |
| C | -10.73486100 | 2.37371800  | 0.38817600  |
| H | 6.12049100   | 2.81432800  | 0.89228300  |
| H | 6.89482200   | 3.59548300  | 2.26052300  |
| H | 6.84661600   | 1.83969800  | 2.16038800  |
| H | 5.76868700   | 1.74608300  | 4.45827600  |
| H | 5.81423700   | 3.49356600  | 4.55499900  |
| H | 4.29154100   | 2.64321800  | 4.78008100  |
| H | 4.60326300   | -1.64389700 | 3.75071100  |
| H | 3.26227800   | -1.97177900 | 4.83513900  |
| H | 4.65400000   | -3.04945400 | 4.80185700  |
| H | 1.74612600   | -3.97265600 | 4.40467600  |

---

|   |              |             |             |
|---|--------------|-------------|-------------|
| H | 2.01649400   | -4.99914100 | 3.00417800  |
| H | 3.14196000   | -5.02818900 | 4.35486900  |
| H | 6.77530500   | 1.41777600  | -0.93317300 |
| H | 7.85419300   | 1.51725800  | -2.31423200 |
| H | 6.46504300   | 2.59116000  | -2.20279300 |
| H | 7.06621600   | 0.73442800  | -4.59651900 |
| H | 5.44151000   | 0.09241700  | -4.80031500 |
| H | 5.68546200   | 1.80488200  | -4.48896100 |
| H | 0.20484100   | -2.97639900 | -4.66434000 |
| H | 1.63274400   | -3.98305600 | -4.46925700 |
| H | 0.04075800   | -4.71163100 | -4.43144700 |
| H | 2.16383600   | -5.02221400 | -2.21085800 |
| H | 1.09989000   | -4.73873100 | -0.84260200 |
| H | 0.56389100   | -5.75381900 | -2.17118000 |
| H | -2.31333200  | 2.61229400  | 2.95536300  |
| H | -2.82111000  | 1.73701500  | 4.39289100  |
| H | -1.25168600  | 2.51414500  | 4.35317800  |
| H | -1.71932900  | -0.46247500 | 5.00570100  |
| H | -0.45059800  | -1.12379500 | 3.98777800  |
| H | -0.13697500  | 0.30717400  | 4.95732100  |
| H | 2.38591800   | 3.03656900  | -3.71169500 |
| H | 1.30364900   | 2.19023800  | -4.80448900 |
| H | 1.34709900   | 3.95071200  | -4.79153300 |
| H | -1.14459100  | 4.04476900  | -4.38836600 |
| H | -1.21398400  | 2.29519700  | -4.42348000 |
| H | -1.86102700  | 3.17010200  | -3.04242100 |
| H | 2.98132000   | 7.34806000  | 0.89108800  |
| H | 8.29242200   | -3.88710900 | -0.93732700 |
| H | -5.25006400  | -3.58071800 | 0.37961300  |
| H | -5.96049100  | -2.06492800 | 0.91302300  |
| H | -5.81939800  | -3.10190000 | -1.92333500 |
| H | -7.28796800  | -2.97847400 | -1.02124200 |
| H | -5.27348600  | 0.29422000  | -2.50553400 |
| H | -4.71627400  | -1.35098000 | -2.76371800 |
| H | -4.65691800  | 0.13003300  | -0.12666000 |
| H | -3.26679600  | -0.31491100 | -1.10330600 |
| H | -9.35597700  | -1.28906700 | -1.96600000 |
| H | -8.26144100  | -2.00644700 | 0.42686100  |
| H | -9.94105700  | -2.08603700 | 0.08974800  |
| H | -9.70369600  | 1.13440500  | -2.11405500 |
| H | -10.79969700 | 0.32031900  | -1.05792100 |
| H | -9.05201600  | -0.36693300 | 3.51461100  |
| H | -9.13805700  | -2.00350600 | 2.88042400  |
| H | -7.70781200  | -1.02795600 | 2.61202900  |
| H | -11.20980600 | -1.42527400 | 2.07746500  |
| H | -11.55308300 | -0.30920900 | 0.79677200  |

---

|   |              |            |             |
|---|--------------|------------|-------------|
| H | -8.88423200  | 3.26409800 | -1.27998900 |
| H | -8.36711500  | 3.44366500 | 0.39118600  |
| H | -7.49540900  | 2.38924000 | -0.69754100 |
| H | -11.04184500 | 3.01723800 | -0.42611600 |
| H | -11.56904200 | 1.73158800 | 0.61481300  |
| H | -10.54294700 | 2.99305000 | 1.25453700  |
| H | -11.19963400 | 0.29253000 | 2.40545300  |

### Conformer 2

|   |             |             |             |
|---|-------------|-------------|-------------|
| C | -3.23529500 | -1.49393600 | 0.84812000  |
| C | -1.83967100 | -0.99599600 | 0.54485000  |
| O | -3.39443400 | -2.61041200 | 1.26554400  |
| C | -1.21874300 | -0.06789500 | 1.36571800  |
| C | 0.11748000  | 0.26311800  | 1.19315600  |
| C | 0.87309000  | -0.32329100 | 0.17793800  |
| C | 0.23366400  | -1.23359300 | -0.66850600 |
| C | -1.09858700 | -1.56829000 | -0.47657600 |
| C | 2.30077100  | 0.01448200  | 0.00878100  |
| C | 2.70028800  | 1.43773800  | 0.01128000  |
| C | 3.29248300  | -1.07120000 | -0.14769400 |
| C | 2.03485700  | 2.35052400  | -0.80169400 |
| C | 2.36380900  | 3.70139600  | -0.79019500 |
| C | 3.36632000  | 4.17885700  | 0.05454300  |
| C | 4.04593000  | 3.26291600  | 0.87046400  |
| C | 3.71329400  | 1.91390100  | 0.84438800  |
| C | 3.31204600  | -2.14073400 | 0.74173300  |
| C | 4.20604000  | -3.19325500 | 0.58351300  |
| C | 5.10429500  | -3.20666400 | -0.48464800 |
| C | 5.09627900  | -2.12627400 | -1.37722800 |
| C | 4.20295400  | -1.07720400 | -1.20363100 |
| S | 2.18758900  | -2.28130300 | 2.09552200  |
| C | 3.15727800  | -3.52375100 | 3.01606000  |
| S | 4.08886000  | -4.49375300 | 1.78198200  |
| S | 6.09492400  | -2.03166200 | -2.84687600 |
| C | 5.84493700  | -0.25487600 | -3.16236200 |
| S | 4.23215600  | 0.19149000  | -2.43343200 |
| S | 1.01576700  | -1.99728900 | -2.05723600 |
| C | -0.25342800 | -3.28327800 | -2.36298300 |
| S | -1.82389800 | -2.65348800 | -1.66990500 |
| S | -2.06453600 | 0.72607700  | 2.70442200  |
| C | -0.56859600 | 1.31849600  | 3.57817300  |
| S | 0.74861700  | 1.47503100  | 2.31647400  |
| C | 0.80394200  | 3.37254900  | -2.92567900 |



---

|   |              |             |             |
|---|--------------|-------------|-------------|
| S | 1.41217900   | 4.73379100  | -1.87181000 |
| S | 5.27526700   | 3.71246000  | 2.07544200  |
| C | 5.93599400   | 2.03539500  | 2.34308500  |
| S | 4.58459400   | 0.86658300  | 1.96984900  |
| S | 0.70244700   | 1.89040900  | -1.86499100 |
| C | 7.13756100   | 1.77975800  | 1.43016800  |
| C | 6.33775000   | 1.88533700  | 3.80997800  |
| C | 4.11123800   | -2.84150900 | 3.99843700  |
| C | 2.19833000   | -4.45368900 | 3.75838800  |
| C | 6.96807700   | 0.56689900  | -2.52564300 |
| C | 5.79719900   | -0.01695200 | -4.67138400 |
| C | -0.41109300  | -3.47610800 | -3.87003500 |
| C | 0.13983600   | -4.59759500 | -1.68495700 |
| C | -0.84953600  | 2.69779300  | 4.17123000  |
| C | -0.16370500  | 0.33004700  | 4.67286400  |
| C | 1.75309300   | 3.13151700  | -4.10011100 |
| C | -0.59527700  | 3.72098500  | -3.43074000 |
| C | 6.00476600   | -4.39649100 | -0.61889000 |
| C | 3.63175000   | 5.65363000  | 0.04855700  |
| O | 4.66417800   | 6.03233200  | 0.74166700  |
| O | 6.90739700   | -4.30433700 | -1.54985500 |
| O | 5.91340300   | -5.38929300 | 0.03959500  |
| O | 2.95097500   | 6.45778800  | -0.51481800 |
| N | -4.24640300  | -0.61982500 | 0.63261500  |
| C | -5.58805400  | -0.97659800 | 1.01578200  |
| C | -6.51108800  | -0.94552100 | -0.19179600 |
| N | -6.43563500  | 0.34822200  | -0.85123900 |
| C | -5.08399900  | 0.68378900  | -1.24273500 |
| C | -4.15388800  | 0.66318900  | -0.04189100 |
| C | -7.42143200  | 1.24511200  | -1.14326100 |
| C | -8.88630500  | 0.96521500  | -0.79873400 |
| C | -9.48055700  | -0.24733000 | -1.57663500 |
| C | -10.84520700 | -0.74556600 | -1.06129200 |
| N | -10.83187800 | -0.77713000 | 0.42793400  |
| C | -10.51826300 | 0.47728700  | 1.16977500  |
| C | -9.13001800  | 0.98151100  | 0.73791800  |
| O | -7.16154500  | 2.29107600  | -1.68137500 |
| O | -10.02253400 | -1.71512300 | 0.82426900  |
| C | -11.11678100 | -2.17499800 | -1.54160900 |
| C | -11.98322200 | 0.12649500  | -1.62220100 |
| C | -10.53202100 | 0.13555800  | 2.66333900  |
| C | -11.57578400 | 1.57513500  | 0.96055700  |
| H | 6.86181400   | 1.88803300  | 0.39220300  |
| H | 7.93218100   | 2.48419400  | 1.64940800  |
| H | 7.51635700   | 0.77556500  | 1.58321100  |
| H | 6.71602900   | 0.88626100  | 3.99116200  |

---

|   |             |             |             |
|---|-------------|-------------|-------------|
| H | 7.12729200  | 2.58673800  | 4.05332100  |
| H | 5.50009600  | 2.06341300  | 4.46620300  |
| H | 4.80135100  | -2.19220100 | 3.48095900  |
| H | 3.55281000  | -2.24842200 | 4.71363900  |
| H | 4.68248900  | -3.58755900 | 4.53978900  |
| H | 1.62123000  | -3.89370300 | 4.48476200  |
| H | 1.51791600  | -4.94165200 | 3.07792300  |
| H | 2.75830100  | -5.21119400 | 4.29413700  |
| H | 7.01011000  | 0.40042300  | -1.45976000 |
| H | 7.92473800  | 0.28971900  | -2.95419000 |
| H | 6.80523700  | 1.62380200  | -2.70371200 |
| H | 6.74280800  | -0.29531000 | -5.12205100 |
| H | 5.00898800  | -0.59033200 | -5.13414300 |
| H | 5.63001600  | 1.03372100  | -4.87669400 |
| H | -0.68821600 | -2.55440100 | -4.35736600 |
| H | 0.51890500  | -3.83089300 | -4.29811700 |
| H | -1.17310100 | -4.22041300 | -4.07002800 |
| H | 1.07877100  | -4.95809400 | -2.08983500 |
| H | 0.25373300  | -4.46583200 | -0.61965600 |
| H | -0.62165100 | -5.34933000 | -1.85823600 |
| H | -1.13816300 | 3.40278100  | 3.40733000  |
| H | -1.64467600 | 2.63155600  | 4.90472500  |
| H | 0.03459900  | 3.07127100  | 4.67386600  |
| H | -0.95422600 | 0.24552800  | 5.41038600  |
| H | 0.02518900  | -0.64860100 | 4.25953500  |
| H | 0.73604000  | 0.67492700  | 5.16933600  |
| H | 2.74947500  | 2.90354300  | -3.75314500 |
| H | 1.40124500  | 2.30242800  | -4.70296300 |
| H | 1.80180300  | 4.01726900  | -4.72382000 |
| H | -0.55563100 | 4.61337000  | -4.04387500 |
| H | -0.98205200 | 2.91542700  | -4.04363100 |
| H | -1.27719200 | 3.89323000  | -2.61201700 |
| H | 4.72654300  | 6.96791700  | 0.68676900  |
| H | 7.39858400  | -5.10478500 | -1.56178900 |
| H | -5.55984700 | -1.95212100 | 1.46544600  |
| H | -5.93163200 | -0.25665300 | 1.75083600  |
| H | -6.19407800 | -1.71260400 | -0.89032100 |
| H | -7.51365400 | -1.16211700 | 0.11570100  |
| H | -5.10197700 | 1.65307500  | -1.70365900 |
| H | -4.73914100 | -0.04660700 | -1.96802300 |
| H | -4.43423900 | 1.45133500  | 0.64492200  |
| H | -3.13918600 | 0.82818400  | -0.36215800 |
| H | -9.33929500 | 1.85230600  | -1.20555800 |
| H | -8.79143700 | -1.07715500 | -1.60646900 |
| H | -9.60458700 | 0.05504900  | -2.60957400 |
| H | -8.37513100 | 0.41425700  | 1.26068500  |

---

|   |              |             |             |
|---|--------------|-------------|-------------|
| H | -9.01515400  | 2.00227700  | 1.08208700  |
| H | -12.06908500 | -2.52278100 | -1.16097200 |
| H | -11.15369100 | -2.18550300 | -2.62322300 |
| H | -10.35104200 | -2.86298500 | -1.22268500 |
| H | -12.15251400 | -0.16611200 | -2.64857500 |
| H | -11.76439500 | 1.18151000  | -1.63437000 |
| H | -11.50633900 | -0.23828400 | 2.95272100  |
| H | -9.79369300  | -0.60821700 | 2.91561200  |
| H | -10.32312300 | 1.02985900  | 3.23577700  |
| H | -11.47477400 | 2.29098900  | 1.76361000  |
| H | -11.46283500 | 2.12521500  | 0.04089400  |
| H | -12.57872100 | 1.17176900  | 0.99986900  |
| H | -12.90455300 | -0.02794100 | -1.07674500 |
